# Supplementary material for: Path Analysis of Psychological Resilience as a Mediator in the Relationship Between Physical Activity and Depressive Symptoms in University Students
Source: Research Square preprint supplement (doi:10.21203/rs.3.rs-6742511/v1), 2025-07-02
Supplement: Supplementary file 1 [file 1b8f527ccc0d034e0cbfde36.docx]

Annex 1

Table 5. Correlation Between PARS-3 and CD-RISC in College Students

| Variable | CD-RISC | Resilience | Strength | Optimism | BDI-Ⅱ |
| --- | --- | --- | --- | --- | --- |
| Intensity | 0.148** | 0.150** | 0. 150** | 0.115** | -0.086** |
| Duration | 0.169** | 0.159** | 0.167** | 0.149** | -0.095** |
| Frequency | 0.206** | 0.180** | 0.219** | 0.192** | -0.122** |
| PARS-3 | 0.191** | 0.183** | 0.180** | 0.169** | -0.121** |

Annex 2

| Table 6. Comparison of the effects of different exercise durations on CD-RISC of college students | | | | | | | | | | | | | | | |
| --- | --- | --- | --- | --- | --- | --- | --- | --- | --- | --- | --- | --- | --- | --- | --- |
| Variable | Overall Situation （1156） | Exercise Intensity Grouping | | | | | Comparison between groups | | | Post Hoc Comparisons | | | | | |
| Low（n=538） | Moderate（n=417） | | High（n=201） | | F（χ2） | | P | Low VS Moderate | | Low VS High | | Moderate VS High | |
| BDI-Ⅱ | 6.54±8.397 | 7.29±9.012 | 6.29±8.107 | 5.05±6.970 | | 5.553 | | ＜0.001 | | | 0.202 | | 0.001 | | 0.141 | |
| Total Score | 60.29±18.717 | 58.00±19.076 | 60.26±17.430 | 66.47±19.020 | | 15.347 | | 0.399 | | | 0.062 | | ＜0.001 | | ＜0.001 | |
| Resilience | 30.76±10.360 | 29.41±10.442 | 30.88±9.745 | 34.11±10.644 | | 15.501 | | 0.263 | | | 0.026 | | ＜0.001 | | ＜0.001 | |
| Strength | 20.13±6.258 | 19.45±6.375 | 20.07±5.829 | 22.05±6.431 | | 13.003 | | 0.414 | | | 0.122 | | ＜0.001 | | ＜0.001 | |
| Optimism | 9.40±3.219 | 9.15±3.336 | 9.30±3.015 | 10.30±3.169 | | 9.923 | | 0.165 | | | 0.456 | | ＜0.001 | | ＜0.001 | |

Annex 3

| Table 7. Comparison of the effects of different exercise durations on CD-RISC of college students | | | | | | | | | | | | | | | |
| --- | --- | --- | --- | --- | --- | --- | --- | --- | --- | --- | --- | --- | --- | --- | --- |
| Variable | Overall Situation （1156） | Exercise Duration Grouping | | | | | Comparison between groups | | | Post Hoc Comparisons | | | | | |
| Low（n=317） | Moderate（n=567） | | High（n=272） | | F（χ2） | | P | Low VS Moderate | | Low VS High | | Moderate VS High | |
| BDI-Ⅱ | 6.54±8.397 | 7.70±9.675 | 6.44±8.285 | 5.41±6.720 | | 5.566 | | 0.004 | | | 0.146 | | 0.002 | | 0.158 | |
| Total Score | 60.29±18.717 | 55.24±19.600 | 61.41±16.828 | 63.83±20.217 | | 17.946 | | ＜0.001 | | | ＜0.001 | | ＜0.001 | | 0.241 | |
| Resilience | 30.76±10.360 | 28.19±10.642 | 31.32±9.498 | 32.58±11.192 | | 15.161 | | ＜0.001 | | | ＜0.001 | | ＜0.001 | | 0.298 | |
| Strength | 20.13±6.258 | 18.39±6.585 | 20.53±5.628 | 21.30±6.703 | | 18.667 | | ＜0.001 | | | ＜0.001 | | ＜0.001 | | 0.090 | |
| Optimism | 9.40±3.219 | 8.66±3.501 | 9.56±2.885 | 9.95±3.388 | | 13.440 | | ＜0.001 | | | ＜0.001 | | ＜0.001 | | 0.271 | |

Annex 4

| Table 8. Comparison of CD-RISC Scores Among College Students with Different Exercise Frequencies | | | | | | | | | | | | | | | |
| --- | --- | --- | --- | --- | --- | --- | --- | --- | --- | --- | --- | --- | --- | --- | --- |
| Variable | Overall Situation （1156） | Intensity Of Exercise Grouping | | | | | Comparison between groups | | | Post Hoc Comparisons | | | | | |
| Low（n=118） | Moderate（n=529） | | High（n=509） | | F（χ2） | | P | Low VS Moderate | | Low VS High | | Moderate VS High | |
| BDI-Ⅱ | 6.54±8.397 | 9.41±10.888 | 6.58±8.476 | 5.84±7.481 | | 8.741 | | ＜0.001 | | | 0.026 | | 0.003 | | 0.364 | |
| Total Score | 60.29±18.717 | 55.24±19.600 | 61.41±16.828 | 63.83±20.217 | | 22.295 | | ＜0.001 | | | ＜0.001 | | ＜0.001 | | 0.008 | |
| Resilience | 30.76±10.360 | 28.19±10.642 | 31.32±9.498 | 32.58±11.192 | | 27.372 | | ＜0.001 | | | ＜0.001 | | ＜0.001 | | 0.009 | |
| Strength | 20.13±6.258 | 18.39±6.585 | 20.53±5.628 | 21.30±6.703 | | 15.353 | | ＜0.001 | | | ＜0.001 | | ＜0.001 | | 0.003 | |
| Optimism | 9.40±3.219 | 8.66±3.501 | 9.56±2.885 | 9.95±3.388 | | 21.712 | | ＜0.001 | | | 0.001 | | ＜0.001 | | 0.009 | |
